# Supplementary material for: Early Warning of Resistance to Bt Toxin Vip3Aa in Helicoverpa zea
Source: MDPI journal article supplement (doi:10.3390/toxins13090618), 2021-09-02
Supplement: s1 [file s1]

# Supplementary Materials: Early Warning of Resistance to Bt Toxin Vip3Aa in *Helicoverpa zea*

Fei Yang, David L Kerns, Nathan S. Little, José C. S. González and Bruce E. Tabashnik

## Supplementary Methods: Adoption of Vip3Aa Corn and Cotton.

We calculated the percentage of acres of corn and cotton planted to Vip3Aa corn and cotton from 2017 to 2020 using the data ABSTC provided for bags of Vip3Aa seeds sold for 12 cotton-growing states (AL, AZ, AR, FL, GA, LA, MS, NM, NC, SC, TN, TX) and for the entire United States (Tables S1-S2). To convert bags of seeds sold to acres planted, we used the following conversion factors for acres per seed bag: 2.9 for corn for the 12 cotton states, 2.6 for corn for the entire U.S., and 5 for all cotton. For corn, the conversion factors are based on 80,000 seeds per bag, with means of 27,273 and 31,358 seeds per acre in the 12 cotton states and the entire U.S., respectively [52,53]. The conversion factor for cotton is based on 250,000 seeds per bag and 50,000 seeds per acre [54,55]. To calculate the percentage of corn and cotton planted with Vip3Aa corn and cotton, we divided the Vip3Aa acres by the total acres for each crop [56,57; Tables S3-S6].

For the calculations described above, we used the sales data provided by ABSTC without adjustment, except for three outlier values for corn in 2019. The 2019 outlier values were 28,992 for AZ; 7,766 for AR; and 20,548 for LA (Table S1). We adjusted these three values because relative to each state's mean for 2018 and 2020, the value for 2019 was 10.0-fold greater for AZ, 3.2-fold greater for LA, and 3.5-fold lower for AR. Thus, to calculate acres of Vip3Aa planted we used the means for 2018 and 2020: 2,898 for AZ, 27,441 for AR, and 6,384 for LA. This adjustment had a minor effect on the percentage adoption of Vip3Aa corn for the 12 cotton-growing states and the entire U.S.

For corn, Yu et al. [58] reported substantially higher rates of Vip3Aa adoption for 2015-2016 than those calculated here for 2017 (Fig. 1 and Table S5). In pairwise comparisons for the eight states included in both studies (AL, AR, GA, LA, MS, SC, TN, and TX) the percentages reported by Yu et al. [58] for 2015-2016 were a mean of 5.5 times higher than those calculated here for 2017. Because it is unlikely Vip3Aa adoption dropped from 2015-2016 to 2017, this discrepancy implies adoption was overestimated in the previous study, underestimated here, or both.

For cotton, Vip3Aa adoption percentages for the U.S. for 2017 to 2020 corresponded well between data reported by the USDA Agricultural Marketing Service (AMS) [59] and those calculated here. The percentages from the USDA AMS versus here were, respectively: 2017: 3.7 vs. 3.7, 2018: 14.1 vs. 11.7, 2019: 28.3 vs. 27.4, and 2019: 48.9 vs. 36.3 ( $r^2 = 0.96$ ,  $df = 2$ ,  $P = 0.02$ ). On average for the four years, the percentages from USDA AMS were 1.1 times higher than those calculated here (range: 1.0 for 2017 to 1.3 for 2020).

**Table S1.** Vip3Aa corn seed bags sold. Source: ABSTC.

| State or Region  | 2017      | 2018      | 2019      | 2020      |
|------------------|-----------|-----------|-----------|-----------|
| AL               | 619       | 757       | 7,193     | 9912      |
| AZ               | 1057      | 1525      | 28,992    | 4271      |
| AR               | 18,742    | 26,590    | 7766      | 28,291    |
| FL               | 5996      | 4761      | 5635      | 4145      |
| GA               | 7668      | 6462      | 10,036    | 8725      |
| LA               | 2793      | 7147      | 20,548    | 5621      |
| MS               | 2523      | 7238      | 6347      | 8600      |
| NM               | 1961      | 2816      | 3111      | 4535      |
| NC               | 21,392    | 20,502    | 66,053    | 54,154    |
| SC               | 5663      | 6311      | 19,324    | 26,342    |
| TN               | 3478      | 6545      | 25,824    | 33,997    |
| TX               | 66,989    | 88,766    | 127,470   | 165,581   |
| 12 cotton states | 138,881   | 179,421   | 328,299   | 354,174   |
| USA              | 1,026,107 | 1,173,270 | 1,786,801 | 2,221,836 |

**Table S2.** Vip3Aa cotton seed bags sold. Source: ABSTC.

| State or Region  | 2017   | 2018    | 2019    | 2020    |
|------------------|--------|---------|---------|---------|
| AL               | 3874   | 11,477  | 24,544  | 27,203  |
| AZ               | 3002   | 6491    | 10,333  | 15,211  |
| AR               | 1925   | 11,839  | 17,840  | 31,253  |
| FL               | 213    | 723     | 2858    | 3763    |
| GA               | 3588   | 29,480  | 64,559  | 96,750  |
| LA               | 1519   | 5191    | 16,068  | 11,597  |
| MS               | 3146   | 11,514  | 27,566  | 32,320  |
| NM               | 10,369 | 2949    | 4016    | 3242    |
| NC               | 1141   | 27,932  | 54,439  | 55,338  |
| SC               | 2199   | 5355    | 12,998  | 15,088  |
| TN               | 4502   | 12,759  | 20,813  | 18,977  |
| TX               | 33,580 | 137,854 | 379,571 | 447,356 |
| 12 cotton states | 69,058 | 263,564 | 635,605 | 758,098 |
| USA              | 92,023 | 324,673 | 739,029 | 862,150 |

**Table S3.** Corn planted (1000 acres). Source: USDA NASS.

| State or Region  | 2017   | 2018   | 2019   | 2020   |
|------------------|--------|--------|--------|--------|
| AL               | 250    | 255    | 320    | 330    |
| AZ               | 65     | 80     | 90     | 75     |
| AR               | 620    | 660    | 770    | 620    |
| FL               | 75     | 95     | 90     | 100    |
| GA               | 290    | 325    | 395    | 420    |
| LA               | 500    | 460    | 570    | 500    |
| MS               | 520    | 480    | 660    | 510    |
| NM               | 125    | 135    | 145    | 125    |
| NC               | 890    | 910    | 990    | 1000   |
| SC               | 350    | 340    | 380    | 400    |
| TN               | 750    | 720    | 970    | 870    |
| TX               | 2450   | 2200   | 2500   | 2250   |
| 12 cotton states | 6885   | 6660   | 7880   | 7200   |
| USA              | 90,167 | 88,871 | 89,700 | 90,819 |

**Table S4.** Cotton planted (1,000 acres). Source: USDA NASS.

| State or Region  | 2017   | 2018   | 2019   | 2020   |
|------------------|--------|--------|--------|--------|
| AL               | 435    | 510    | 540    | 450    |
| AZ               | 160    | 160    | 160    | 125    |
| AR               | 445    | 485    | 620    | 525    |
| FL               | 99     | 117    | 112    | 98     |
| GA               | 1280   | 1430   | 1400   | 1190   |
| LA               | 220    | 195    | 280    | 170    |
| MS               | 630    | 620    | 710    | 530    |
| NM               | 66     | 77     | 63     | 43     |
| NC               | 375    | 430    | 510    | 360    |
| SC               | 250    | 300    | 300    | 190    |
| TN               | 345    | 360    | 410    | 280    |
| TX               | 7000   | 7750   | 7050   | 6800   |
| 12 cotton states | 11,305 | 12,434 | 12,155 | 10,761 |
| USA              | 12,465 | 13,850 | 13,508 | 11,890 |

**Table S5.** Percentage of corn acres planted with Vip3Aa corn.

| State or Region  | 2017 | 2018 | 2019 | 2020 |
|------------------|------|------|------|------|
| AL               | 0.7  | 0.9  | 6.5  | 8.7  |
| AZ               | 4.7  | 5.5  | 9.3  | 16.5 |
| AR               | 8.8  | 11.7 | 10.3 | 13.2 |
| FL               | 23.2 | 14.5 | 18.2 | 12.0 |
| GA               | 7.7  | 5.8  | 7.4  | 6.0  |
| LA               | 1.6  | 4.5  | 3.2  | 3.3  |
| MS               | 1.4  | 4.4  | 2.8  | 4.9  |
| NM               | 4.5  | 6.0  | 6.2  | 10.5 |
| NC               | 7.0  | 6.5  | 19.3 | 15.7 |
| SC               | 4.7  | 5.4  | 14.7 | 19.1 |
| TN               | 1.3  | 2.6  | 7.7  | 11.3 |
| TX               | 7.9  | 11.7 | 14.8 | 21.3 |
| 12 cotton states | 5.8  | 7.8  | 11.3 | 14.3 |
| USA              | 3.0  | 3.4  | 5.2  | 6.4  |

**Table S6.** Percentage of cotton acres planted with Vip3Aa cotton.

| State or Region  | 2017 | 2018 | 2019 | 2020 |
|------------------|------|------|------|------|
| AL               | 4.5  | 11.3 | 22.7 | 30.2 |
| AZ               | 9.4  | 20.3 | 32.3 | 60.8 |
| AR               | 2.2  | 12.2 | 14.4 | 29.8 |
| FL               | 1.1  | 3.1  | 12.8 | 19.2 |
| GA               | 1.4  | 10.3 | 23.1 | 40.7 |
| LA               | 3.5  | 13.3 | 28.7 | 34.1 |
| MS               | 2.5  | 9.3  | 19.4 | 30.5 |
| NM               | 78.6 | 19.1 | 31.9 | 37.7 |
| NC               | 1.5  | 32.5 | 53.4 | 76.9 |
| SC               | 4.4  | 8.9  | 21.7 | 39.7 |
| TN               | 6.5  | 17.7 | 25.4 | 33.9 |
| TX               | 2.4  | 8.9  | 26.9 | 32.9 |
| 12 cotton states | 3.1  | 10.6 | 26.1 | 35.2 |
| USA              | 3.7  | 11.7 | 27.4 | 36.3 |

**Table S7.** Larvae of *H. zea* per ear of Vip3Aa corn relative to comparable non-Bt corn in four previous field studies where the efficacy of the Vip3Aa corn can be attributed primarily or entirely to Vip3Aa.

| Reference     | Field site(s)   | Year(s) | Larvae of <i>H. zea</i> per ear |                    |               | Efficacy (%) <sup>a</sup> | Other Bt toxins in the Vip3Aa corn |
|---------------|-----------------|---------|---------------------------------|--------------------|---------------|---------------------------|------------------------------------|
|               |                 |         | Vip3Aa corn                     | Non-Bt corn        | Vip3Aa/Non-Bt |                           |                                    |
| [19], Table 1 | Snook, TX       | 2018    | 0.79                            | 0.93               | 0.85          | 15.1                      | Cry1Ab, Cry1Fa <sup>b</sup>        |
| [33], Table 1 | Beltsville, MD  | 2007    | 0.055 <sup>c</sup>              | 1.74               | 0.03          | 96.8                      | None                               |
| [33], Table 1 | Beltsville, MD  | 2009    | 0.04                            | 1.23               | 0.03          | 96.7                      | None                               |
| [17], Table 5 | LA <sup>d</sup> | 2018    | 0.06                            | 0.935 <sup>e</sup> | 0.06          | 93.6                      | Cry1Ab, Cry1Fa <sup>b</sup>        |
| [17], Table 5 | LA <sup>d</sup> | 2018    | 0.01                            | 0.935 <sup>e</sup> | 0.01          | 98.9                      | Cry1A.105, Cry2Ab <sup>b</sup>     |
| [21], p. 963  | Winnsboro, LA   | 2018-19 | 0.0008 <sup>f</sup>             | 0.77 <sup>g</sup>  | 0.001         | 99.9                      | Cry1Ab <sup>h</sup>                |

a Efficacy = 100% X (1 – [larvae per Vip3Aa ear/Non-Bt ear])

b Corn containing these toxins and not Vip3Aa was not effective

c Mean for male and female plants as source of the Vip3Aa gene

d Data pooled for two sites, one in Franklin Parish, the other in Tensas Parish

e Mean for two non-Bt hybrids

f One third instar larvae seen in 1200 ears

g Based on pupae in pure non-Bt (Table 1), which could underestimate number of larvae and thus overestimate Vip3Aa/Non-Bt

h *H. zea* "highly resistant to Cry1Ab" in diet bioassays

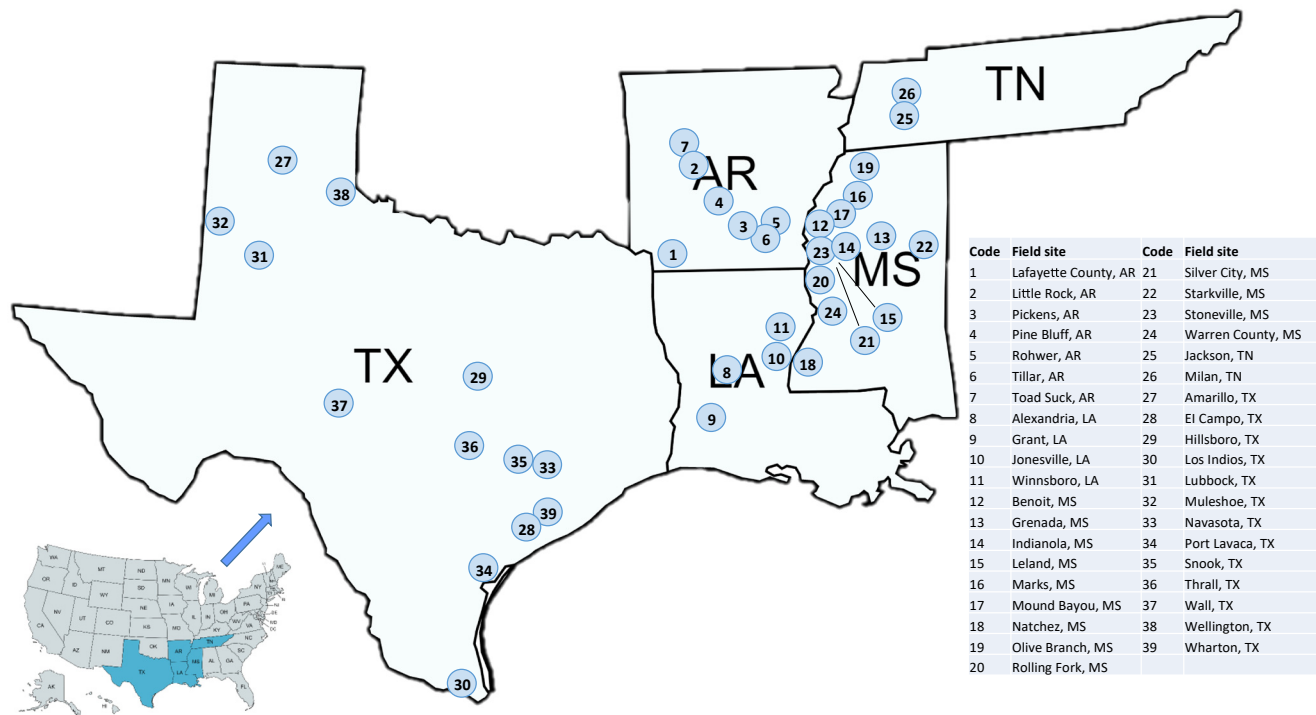

Figure S1. Map of field sites for monitoring resistance of *H. zea* to Vip3Aa.

## References

52. Schnell, R., K. Horn, E. Blair, and S. Murray. 2020. 2020 Texas Corn Performance Variety Trials. Texas A&M AgriLife. SCS-2020-11. <https://varietytesting.tamu.edu/files/corn/2020/2020-CORN-PUBLICATION.PDF>
53. Saavoss, M., T. Capehart, W. McBride, and A. Effland. 2021. Trends in Production Practices and Costs of the U.S. Corn Sector, ERR-2 USDA, Economic Research Service. <https://www.ers.usda.gov/webdocs/publications/101722/err-294.pdf?v=2087.7>
54. Robinson, E. Calculator compares cotton seed costs. 2003. FarmProgress. <https://www.farmprogress.com/calculator-compares-cotton-seed-costs>
55. U.S. Environmental Protection Agency (EPA). 2010. Acres Planted per Day and Seeding Rates of Crops Grown in the United States. <https://www.epa.gov/sites/default/files/2018-01/documents/seeding-rates-and-acres-planted-per-day-revised-final-030111.pdf>
56. USDA National Agricultural Statistics Service (NASS). 2020. Crop Production. [https://www.nass.usda.gov/Publications/Todays\\_Reports/reports/cropan20.pdf](https://www.nass.usda.gov/Publications/Todays_Reports/reports/cropan20.pdf)
57. USDA National Agricultural Statistics Service (NASS). 2021. Acreage. [https://www.nass.usda.gov/Publications/Todays\\_Reports/reports/acrg0621.pdf](https://www.nass.usda.gov/Publications/Todays_Reports/reports/acrg0621.pdf)
58. Yu, J., Hennessy, D.A., Wu, F. The impact of Bt corn on aflatoxin-related insurance claims in the United States. *Sci. Rep.* **2020**, *10*, 10046.
59. USDA Agricultural Marketing Service. Cotton Varieties Planted 2020 Crop. <https://www.ams.usda.gov/mnreports/cnavar.pdf>
